# Supplementary material for: Frailty Index and Cardiovascular Disease among Middle-Aged and Older Chinese Adults: A Nationally Representative Cross-Sectional and Follow-Up Study
Source: MDPI journal article supplement (doi:10.3390/jcdd9070228), 2022-07-18
Supplement: s1 [file s1]

## Supplementary material

**Table S1.** List of health deficits items included in the frailty index

**Table S2.** Baseline characteristics of 16,293 participants by frailty status in the cross-sectional analysis

**Table S3.** Cross-sectional association between the frailty index and CVD

**Table S4.** Cross-sectional association between the frailty index and CVD in subpopulations of 10,803 participants underwent biomarkers measurements

**Table S5.** Longitudinal association between the frailty index and CVD in subpopulations of 8971 participants underwent biomarkers measurements

**Table S6.** Longitudinal association between the frailty index and CVD events by competing risk analysis

**Table S7.** Cross-sectional association between the frailty index and CVD in complete dataset

**Table S8.** Longitudinal association between the frailty index and CVD events in complete dataset

**Figure S1.** Cross-sectional association between the frailty index and CVD stratified by age, gender, residence, BMI, and chronic disease status

**Table S1.** List of health deficits items included in the frailty index.

| Type of deficit                         | Item | Variables                                             | Cut-off point                                 |
|-----------------------------------------|------|-------------------------------------------------------|-----------------------------------------------|
| Activities of daily living              | 1    | Bathing                                               | No=0; a little =0.33; need help = 0.67; Yes=1 |
|                                         | 2    | Dressing                                              | No=0; a little =0.33; need help = 0.67; Yes=1 |
|                                         | 3    | Use of toilet                                         | No=0; a little =0.33; need help = 0.67; Yes=1 |
|                                         | 4    | Transferring                                          | No=0; a little =0.33; need help = 0.67; Yes=1 |
|                                         | 5    | Continence                                            | No=0; a little =0.33; need help = 0.67; Yes=1 |
|                                         | 6    | Eating                                                | No=0; a little =0.33; need help = 0.67; Yes=1 |
| Instrumental activities of daily living | 7    | Cooking                                               | No=0; a little =0.33; need help = 0.67; Yes=1 |
|                                         | 8    | Shopping                                              | No=0; a little =0.33; need help = 0.67; Yes=1 |
|                                         | 9    | Doing household                                       | No=0; a little =0.33; need help = 0.67; Yes=1 |
|                                         | 10   | Taking medicine                                       | No=0; a little =0.33; need help = 0.67; Yes=1 |
|                                         | 11   | Managing money                                        | No=0; a little =0.33; need help = 0.67; Yes=1 |
| Physical functional limitations         | 12   | Lift a weight of 5 kg                                 | No=0; a little =0.33; need help = 0.67; Yes=1 |
|                                         | 13   | Walking 1 km                                          | No=0; a little =0.33; need help = 0.67; Yes=1 |
|                                         | 14   | Walking 100m                                          | No=0; a little =0.33; need help = 0.67; Yes=1 |
|                                         | 15   | Stooping, kneeling, or crouching                      | No=0; a little =0.33; need help = 0.67; Yes=1 |
|                                         | 16   | Able to stand up from sitting                         | No=0; a little =0.33; need help = 0.67; Yes=1 |
|                                         | 17   | Able to pick up a coin from a table                   | No=0; a little =0.33; need help = 0.67; Yes=1 |
|                                         | 18   | Running or jogging about 1 km                         | No=0; a little =0.33; need help = 0.67; Yes=1 |
|                                         | 19   | Reaching or extend arms                               | No=0; a little =0.33; need help = 0.67; Yes=1 |
|                                         | 20   | Climbing several flights of stairs without resting    | No=0; a little =0.33; need help = 0.67; Yes=1 |
| Chronic disease                         | 21   | Chronic lung diseases (Chronic bronchitis, emphysema) | Yes=1, no=0                                   |
|                                         | 22   | Asthma                                                | Yes=1, no=0                                   |

|                        |    |                                                                           |                                                           |
|------------------------|----|---------------------------------------------------------------------------|-----------------------------------------------------------|
|                        | 23 | Cancer                                                                    | Yes=1, no=0                                               |
|                        | 24 | Arthritis or Rheumatism                                                   | Yes=1, no=0                                               |
|                        | 25 | Gastric or duodenal ulcer                                                 | Yes=1, no=1                                               |
|                        | 26 | Kidney disease                                                            | Yes=1, no=1                                               |
|                        | 27 | Liver disease                                                             | Yes=1, no=1                                               |
|                        | 28 | Memory related disease (Dementia, brain atrophy, and Parkinson's disease) | Yes=1, no=0                                               |
|                        | 29 | Emotional, nervous, or psychiatric problems                               | Yes=1, no=0                                               |
| Mental health          | 30 | Feel depressed                                                            | Always=1; often=0.33; sometimes=0.67; seldom or never=0   |
|                        | 31 | Feel fearful                                                              | Always=1; often=0.33; sometimes=0.67; seldom or never=0   |
|                        | 32 | Feel happy                                                                | Always=1; often=0.33; sometimes=0.67; seldom or never=0   |
|                        | 33 | Feel everything was an effort                                             | Always=1; often=0.33; sometimes=0.67; seldom or never=0   |
|                        | 34 | Feel could not get "going"                                                | Always=1; often=0.33; sometimes=0.67; seldom or never=0   |
| Subjective functioning | 35 | Self-rated health                                                         | Very good=0; good=0.25; average=0.5; bad=0.75; very bad=1 |

**Table S2.** Baseline characteristics of 16,293 participants by frailty status in the cross-sectional analysis.

| Characteristic                                  | Total (N=16,293) | Robust (N=8791) | Pre-frailty (N=5844) | Frailty (N=1658) | <i>P</i> value |
|-------------------------------------------------|------------------|-----------------|----------------------|------------------|----------------|
| Age (mean ± SD)                                 | 58.95 ± 9.61     | 56.83 ± 8.73    | 60.34 ± 9.59 *       | 65.26 ± 10.41 ** | <0.0001        |
| Sex, Male, n (%)                                | 7959 (48.85)     | 4913 (55.89)    | 2436 (41.68) *       | 610 (36.79) **   | <0.0001        |
| Education level, n (%)                          |                  |                 |                      |                  | <0.0001        |
| No formal education (Illiterate)                | 4437 (27.23)     | 1692 (19.25)    | 1933 (33.08) *       | 812 (48.97) **   |                |
| Elementary school                               | 6370 (39.10)     | 3237 (36.82)    | 2520 (43.12) *       | 613 (36.97) **   |                |
| Junior high school or above                     | 5486 (33.67)     | 3862 (43.93)    | 1391 (23.80) *       | 233 (14.05) **   |                |
| Married, n (%)                                  | 13,158 (80.76)   | 7319 (83.26)    | 4620 (79.06) *       | 1219 (73.52) **  | <0.0001        |
| Residence, rural, n (%)                         | 9734 (59.74)     | 4723 (53.73)    | 3852 (65.91) *       | 1159 (69.90) **  | <0.0001        |
| Current smoker, n (%) <sup>a</sup>              | 4984 (30.76)     | 3014 (34.56)    | 1620 (27.79) *       | 350 (21.21) **   | <0.0001        |
| Drinker, n (%)                                  | 5465 (33.54)     | 3484 (39.63)    | 1667 (28.52) *       | 314 (18.94) **   | <0.0001        |
| Comorbidities <sup>a</sup>                      |                  |                 |                      |                  |                |
| Hypertension, n (%)                             | 4252 (26.15)     | 1842 (20.97)    | 1754 (30.09) *       | 656 (39.73) **   | <0.0001        |
| Diabetes, n (%)                                 | 1008 (6.20)      | 405 (4.61)      | 420 (7.21) *         | 183 (11.10) **   | <0.0001        |
| Dyslipidemia, n (%)                             | 1611 (9.95)      | 708 (8.08)      | 661 (11.39) *        | 242 (14.86) **   | <0.0001        |
| History of medication use, n (%) <sup>a</sup>   |                  |                 |                      |                  |                |
| Antihypertensive medications                    | 2406 (19.04)     | 970 (14.65)     | 1070 (22.26) *       | 366 (30.20) **   | <0.0001        |
| Antidiabetic medications                        | 516 (4.08)       | 179 (2.70)      | 238 (4.95) *         | 99 (8.17) **     | <0.0001        |
| Lipid-lowering therapy                          | 627 (4.96)       | 222 (3.35)      | 284 (5.91) *         | 121 (9.98) **    | <0.0001        |
| Height, m (mean ± SD)                           | 1.58 ± 0.09      | 1.60 ± 0.08     | 1.57 ± 0.08 *        | 1.54 ± 0.09 **   | <0.0001        |
| Weight, kg (mean ± SD)                          | 58.81 ± 11.86    | 60.51 ± 11.72   | 57.46 ± 11.58 *      | 55.09 ± 11.11 ** | <0.0001        |
| BMI, Kg/m <sup>2</sup> (mean ± SD) <sup>a</sup> | 23.45 ± 3.94     | 23.65 ± 3.81    | 23.29 ± 4.05 *       | 23.02 ± 4.14 *   | <0.0001        |

Continued

| Table S2 continued               |                        |                        |                                    |                                      |         |
|----------------------------------|------------------------|------------------------|------------------------------------|--------------------------------------|---------|
| Characteristic                   | Total (N=16,293)       | Robust (N=8791)        | Pre-frailty (N=5844)               | Frailty (N=1658)                     | P value |
| SBP (mean $\pm$ SD) <sup>a</sup> | 129.78 $\pm$ 21.50     | 128.86 $\pm$ 20.41     | 129.94 $\pm$ 22.10                 | 133.80 $\pm$ 23.96 <sup>++</sup>     | <0.0001 |
| DBP (mean $\pm$ SD) <sup>a</sup> | 76.94 $\pm$ 12.90      | 77.32 $\pm$ 12.77      | 76.29 $\pm$ 12.86 <sup>*</sup>     | 77.52 $\pm$ 13.52                    | <0.0001 |
| Biomarkers <sup>b, c</sup>       |                        |                        |                                    |                                      |         |
| FBG, mg/dL                       | 102.42 (94.50,113.58)  | 102.60 (94.68, 113.40) | 102.24 (93.96, 113.04)             | 103.14 (95.22, 116.64) <sup>++</sup> | 0.0066  |
| HbA1c, %                         | 5.1 (4.9, 5.4)         | 5.1 (4.9, 5.4)         | 5.1 (4.9, 5.5) <sup>*</sup>        | 5.2 (4.9, 5.5) <sup>*</sup>          | <0.0001 |
| TC, mg/dL                        | 193.20 $\pm$ 38.28     | 192.80 $\pm$ 38.49     | 193.61 $\pm$ 37.67                 | 193.69 $\pm$ 39.41                   | 0.5288  |
| TG, mg/dL                        | 106.20 (75.23, 155.76) | 105.32 (75.23, 156.65) | 105.32 (75.23, 151.34)             | 113.28 (79.65, 165.50) <sup>++</sup> | 0.0015  |
| LDL-c, mg/dL                     | 116.37 $\pm$ 34.94     | 116.10 $\pm$ 35.23     | 116.91 $\pm$ 34.60                 | 115.78 $\pm$ 34.70                   | 0.4408  |
| HDL-c, mg/dL                     | 51.07 $\pm$ 15.33      | 50.60 $\pm$ 15.21      | 51.85 $\pm$ 15.31 <sup>*</sup>     | 50.60 $\pm$ 15.92 <sup>+</sup>       | 0.0002  |
| eGFR, mL/min/1.73 m <sup>2</sup> | 90.52 (72.10, 102.86)  | 92.09 (75.90, 103.83)  | 89.31 (70.11, 102.40) <sup>*</sup> | 86.13 (63.12, 99.47) <sup>++</sup>   | <0.0001 |
| Frailty index, mean (IQR)        | 0.09 (0.04,0.16)       | 0.05 (0.02,0.07)       | 0.15 (0.12,0.19) <sup>*</sup>      | 0.33 (0.28,0.40) <sup>++</sup>       | <0.0001 |

Abbreviation: BMI, body mass index; SBP, systolic blood pressure; DBP, diastolic blood pressure; FBG, fasting blood glucose; HbA1c, glycated hemoglobin; TC, total cholesterol; TG, triglycerides. LDL-c, low-density lipoprotein cholesterol; HDL-c, high-density lipoprotein cholesterol; eGFR, estimated glomerular filtration rate.

<sup>a</sup> Missing data: 92 for smoking status, 30 for hypertension, 36 for diabetes mellitus, 104 for dyslipidemia, 34 for hypertension medications, 38 for diabetes medications, 113 for lipid-lowering therapy, 3404 for BMI, 3315 for SBP, 3284 for DBP.

<sup>b</sup> Measured in subpopulation of 10,803 participants.

<sup>c</sup> Data shown as median (IQR) or mean  $\pm$  SD.

<sup>\*</sup> Different from the robust. <sup>+</sup> Different from the pre-frailty.

**Table S3.** Cross-sectional association between the frailty index and CVD.

| Outcome           | Case/N    | Model 1 OR (95% CI)    | Model 2 OR (95% CI)   | Model 3 OR (95% CI)   |
|-------------------|-----------|------------------------|-----------------------|-----------------------|
| CVD events        |           |                        |                       |                       |
| Robust            | 688/8791  | Reference              | Reference             | Reference             |
| Pre-frailty       | 1093/5844 | 2.47 (2.23, 2.75) ***  | 2.54 (2.27, 2.83) *** | 2.54 (2.28, 2.84) *** |
| Frailty           | 537/1658  | 4.64 (4.05, 5.32) ***  | 4.74 (4.09, 5.50) *** | 4.76 (4.10, 5.52) *** |
| Per 0.1 increment |           | 1.63 (1.57, 1.69) ***  | 1.64 (1.57, 1.71) *** | 1.64 (1.57, 1.71) *** |
| Heart disease     |           |                        |                       |                       |
| Robust            | 611/8791  | Reference              | Reference             | Reference             |
| Pre-frailty       | 965/5844  | 2.40 (2.15, 2.68) ***  | 2.48 (2.21, 2.79) *** | 2.49 (2.22, 2.80) *** |
| Frailty           | 421/1658  | 3.73 (3.23, 4.32) ***  | 3.79 (3.24, 4.44) *** | 3.82 (3.26, 2.80) *** |
| Per 0.1 increment |           | 1.50 (1.44, 1.56) ***  | 1.50 (1.44, 1.57) *** | 1.50 (1.44, 1.57) *** |
| Stroke            |           |                        |                       |                       |
| Robust            | 91/8791   | Reference              | Reference             | Reference             |
| Pre-frailty       | 176/5844  | 2.89 (2.23, 3.75) ***  | 2.56 (1.96, 3.34) *** | 2.55 (1.96, 3.34) *** |
| Frailty           | 157/1658  | 8.96 (6.76, 11.87) *** | 7.11 (5.29, 9.56) *** | 7.04 (5.24, 9.47) *** |
| Per 0.1 increment |           | 1.82 (1.71, 1.94) ***  | 1.71 (1.60, 1.83) *** | 1.71 (1.59, 1.83) *** |

Statistical significant at \* $P < 0.05$ , \*\* $P < 0.01$ , and \*\*\* $P < 0.001$ .

Model 1 was adjusted age and gender.

Model 2 was additionally adjusted educational level, marital status, residence, smoking status, drinking status, hypertension, diabetes mellitus, dyslipidemia, and use of antihypertensive medications, antidiabetic medications and lipid-lowering therapy.

Model 3 was additionally adjusted BMI, SBP and DBP.

**Table S4.** Cross-sectional association between the frailty index and CVD in subpopulations of 10,803 participants underwent biomarkers measurements.

|                   | OR (95% CI)           |                       |                        |
|-------------------|-----------------------|-----------------------|------------------------|
|                   | CVD                   | Heart disease         | Stroke                 |
| Pre-frailty       |                       |                       |                        |
| Model 3           | 2.54 (2.28, 2.84) *** | 2.49 (2.22, 2.80) *** | 2.55 (1.96, 3.34) ***  |
| Model 3 plus      |                       |                       |                        |
| FBG               | 2.51 (2.19, 2.87) *** | 2.39 (2.07, 2.75) *** | 2.85 (2.04, 3.98) ***  |
| HbA1c             | 2.51 (2.19, 2.87) *** | 2.39 (2.08, 2.75) *** | 2.86 (2.05, 3.99) ***  |
| TC                | 2.51 (2.19, 2.87) *** | 2.39 (2.08, 2.75) *** | 2.86 (2.05, 4.00) ***  |
| TG                | 2.52 (2.20, 2.88) *** | 2.39 (2.08, 2.76) *** | 2.87 (2.05, 4.01) ***  |
| LDL-c             | 2.51 (2.19, 2.88) *** | 2.39 (2.08, 2.76) *** | 2.87 (2.05, 4.00) ***  |
| HDL-c             | 2.51 (2.19, 2.88) *** | 2.39 (2.08, 2.75) *** | 2.90 (2.07, 4.04) ***  |
| eGFR              | 2.51 (2.20, 2.87) *** | 2.39 (2.08, 2.76) *** | 2.86 (2.05, 3.99) ***  |
| All biomarkers    | 2.54 (2.21, 2.90) *** | 2.41 (2.10, 2.78) *** | 2.89 (2.07, 4.03) ***  |
| Frailty           |                       |                       |                        |
| Model 3           | 4.76 (4.10, 5.52) *** | 3.82 (3.26, 2.80) *** | 7.04 (5.24, 9.47) ***  |
| Model 3 plus      |                       |                       |                        |
| FBG               | 4.89 (4.09, 5.84) *** | 3.78 (3.13, 4.57) *** | 7.90 (5.47, 11.39) *** |
| HbA1c             | 4.89 (4.09, 5.84) *** | 3.78 (3.13, 4.57) *** | 7.90 (5.48, 11.40) *** |
| TC                | 4.90 (4.10, 5.86) *** | 3.79 (3.14, 4.57) *** | 7.93 (5.49, 11.43) *** |
| TG                | 4.90 (4.09, 5.84) *** | 3.78 (3.13, 4.57) *** | 7.90 (5.48, 11.39) *** |
| LDL-c             | 4.91 (4.11, 5.87) *** | 3.79 (3.14, 4.58) *** | 7.95 (5.51, 11.47) *** |
| HDL-c             | 4.89 (4.09, 5.84) *** | 3.78 (3.13, 4.57) *** | 7.90 (5.48, 11.40) *** |
| eGFR              | 4.92 (4.11, 5.88) *** | 3.79 (3.14, 4.58) *** | 7.87 (5.45, 11.35) *** |
| All biomarkers    | 4.95 (4.14, 5.92) *** | 3.81 (3.16, 4.61) *** | 7.92 (5.49, 11.44) *** |
| Per 0.1 increment |                       |                       |                        |
| Model 3           | 1.64 (1.57, 1.71) *** | 1.50 (1.44, 1.57) *** | 1.71 (1.59, 1.83) ***  |
| Model 3 plus      |                       |                       |                        |
| FBG               | 1.65 (1.56, 1.73) *** | 1.50 (1.42, 1.58) *** | 1.73 (1.59, 1.88) ***  |
| HbA1c             | 1.65 (1.56, 1.73) *** | 1.50 (1.42, 1.58) *** | 1.73 (1.59, 1.89) ***  |
| TC                | 1.65 (1.56, 1.74) *** | 1.50 (1.42, 1.58) *** | 1.74 (1.60, 1.89) ***  |
| TG                | 1.64 (1.56, 1.73) *** | 1.50 (1.42, 1.58) *** | 1.73 (1.59, 1.88) ***  |
| LDL-c             | 1.65 (1.56, 1.74) *** | 1.50 (1.42, 1.58) *** | 1.74 (1.60, 1.89) ***  |
| HDL-c             | 1.64 (1.56, 1.73) *** | 1.50 (1.42, 1.58) *** | 1.73 (1.59, 1.88) ***  |
| eGFR              | 1.65 (1.57, 1.74) *** | 1.50 (1.42, 1.58) *** | 1.74 (1.60, 1.89) ***  |
| All biomarkers    | 1.66 (1.57, 1.74) *** | 1.50 (1.42, 1.58) *** | 1.74 (1.60, 1.90) ***  |

Statistically significant at \* $P < 0.05$ , \*\* $P < 0.01$ , and \*\*\* $P < 0.001$ .

Abbreviation: FBG, fasting blood glucose; HbA1c, glycated hemoglobin; TC, total cholesterol; TG, triglycerides. LDL-c, low-density lipoprotein cholesterol; HDL-c, high-density lipoprotein cholesterol; eGFR, estimated glomerular filtration rate.

Model 3 was adjusted age, gender, educational level, marital status, residence, smoking status, drinking status, hypertension, diabetes mellitus, dyslipidemia, use of antihypertensive medications, antidiabetic medications and lipid-lowering therapy, BMI, SBP, DBP.

**Table S5.** Longitudinal association between the frailty index and CVD events in subpopulations of 8971 participants underwent biomarkers measurements.

|                   | HR (95% CI)           |                       |                       |
|-------------------|-----------------------|-----------------------|-----------------------|
|                   | CVD                   | Heart disease         | Stroke                |
| Pre-frailty       |                       |                       |                       |
| Model 3           | 1.53 (1.39, 1.68) *** | 1.62 (1.45, 1.81) *** | 1.23 (1.03, 1.46) *   |
| Model 3 plus      |                       |                       |                       |
| FBG               | 1.54 (1.38, 1.72) *** | 1.63 (1.44, 1.85) *** | 1.24 (1.02, 1.52) *   |
| HbA1c             | 1.54 (1.38, 1.72) *** | 1.63 (1.44, 1.85) *** | 1.24 (1.02, 1.51) *   |
| TC                | 1.54 (1.38, 1.72) *** | 1.63 (1.44, 1.85) *** | 1.24 (1.02, 1.52) *   |
| TG                | 1.54 (1.38, 1.72) *** | 1.63 (1.44, 1.85) *** | 1.25 (1.02, 1.52) *   |
| LDL-c             | 1.54 (1.38, 1.72) *** | 1.64 (1.44, 1.86) *** | 1.24 (1.02, 1.52) *   |
| HDL-c             | 1.54 (1.38, 1.72) *** | 1.63 (1.44, 1.85) *** | 1.25 (1.02, 1.53) *   |
| eGFR              | 1.54 (1.38, 1.72) *** | 1.63 (1.44, 1.85) *** | 1.24 (1.02, 1.51) *   |
| All biomarkers    | 1.54 (1.38, 1.72) *** | 1.63 (1.44, 1.85) *** | 1.26 (1.03, 1.53) *   |
| Frailty           |                       |                       |                       |
| Model 3           | 2.17 (1.88, 2.50) *** | 2.16 (1.83, 2.56) *** | 2.06 (1.63, 2.63) *** |
| Model 3 plus      |                       |                       |                       |
| FBG               | 2.11 (1.79, 2.49) *** | 2.19 (1.81, 2.64) *** | 1.97 (1.48, 2.61) *** |
| HbA1c             | 2.11 (1.79, 2.49) *** | 2.19 (1.81, 2.64) *** | 1.98 (1.49, 2.62) *** |
| TC                | 2.12 (1.80, 2.50) *** | 2.19 (1.81, 2.65) *** | 1.99 (1.50, 2.64) *** |
| TG                | 2.11 (1.79, 2.49) *** | 2.19 (1.81, 2.64) *** | 1.98 (1.49, 2.62) *** |
| LDL-c             | 2.11 (1.79, 2.49) *** | 2.20 (1.82, 2.66) *** | 1.99 (1.50, 2.64) *** |
| HDL-c             | 2.11 (1.79, 2.49) *** | 2.19 (1.81, 2.64) *** | 1.97 (1.48, 2.61) *** |
| eGFR              | 2.11 (1.78, 2.49) *** | 2.18 (1.80, 2.64) *** | 1.98 (1.49, 2.62) *** |
| All biomarkers    | 2.12 (1.80, 2.50) *** | 2.20 (1.82, 2.66) *** | 1.99 (1.50, 2.64) *** |
| Per 0.1 increment |                       |                       |                       |
| Model 3           | 1.29 (1.24, 1.34) *** | 1.28 (1.22, 1.34) *** | 1.28 (1.03, 1.46) *** |
| Model 3 plus      |                       |                       |                       |
| FBG               | 1.29 (1.23, 1.35) *** | 1.29 (1.22, 1.35) *** | 1.29 (1.19, 1.40) *** |
| HbA1c             | 1.29 (1.23, 1.35) *** | 1.28 (1.22, 1.35) *** | 1.29 (1.19, 1.40) *** |
| TC                | 1.29 (1.23, 1.35) *** | 1.28 (1.22, 1.35) *** | 1.29 (1.19, 1.40) *** |
| TG                | 1.29 (1.23, 1.35) *** | 1.28 (1.22, 1.35) *** | 1.29 (1.19, 1.40) *** |
| LDL-c             | 1.29 (1.23, 1.35) *** | 1.29 (1.22, 1.35) *** | 1.29 (1.19, 1.40) *** |
| HDL-c             | 1.29 (1.23, 1.35) *** | 1.28 (1.22, 1.35) *** | 1.29 (1.19, 1.40) *** |
| eGFR              | 1.29 (1.23, 1.35) *** | 1.28 (1.22, 1.35) *** | 1.29 (1.19, 1.40) *** |
| All biomarkers    | 1.29 (1.23, 1.35) *** | 1.28 (1.22, 1.35) *** | 1.29 (1.19, 1.40) *** |

Statistically significant at \* $P < 0.05$ , \*\* $P < 0.01$ , and \*\*\* $P < 0.001$ .



Abbreviation: FBG, fasting blood glucose; HbA1c, glycated hemoglobin; TC, total cholesterol; TG, triglycerides. LDL-c, low-density lipoprotein cholesterol; HDL-c, high-density lipoprotein cholesterol; eGFR, estimated glomerular filtration rate.

Model 3 was adjusted age, gender, educational level, marital status, residence, smoking status, drinking status, hypertension, diabetes mellitus, dyslipidemia, use of antihypertensive medications, antidiabetic medications and lipid-lowering therapy, BMI, SBP, DBP.

**Table S6.** Longitudinal association between the frailty index and CVD events by competing risk analysis

| Outcome           | Case/N   | Incidence per<br>1000 person-<br>years | Model 1 HR (95% CI)   | Model 2 HR (95% CI)   | Model 3 HR (95% CI)   |
|-------------------|----------|----------------------------------------|-----------------------|-----------------------|-----------------------|
| CVD events        |          |                                        |                       |                       |                       |
| Robust            | 954/7917 | 22.47                                  | Reference             | Reference             | Reference             |
| Pre-frailty       | 890/4583 | 36.52                                  | 1.51 (1.37, 1.65) *** | 1.49 (1.35, 1.63) *** | 1.51 (1.37, 1.65) *** |
| Frailty           | 278/1080 | 62.21                                  | 1.96 (1.70, 2.26) *** | 1.91 (1.65, 2.20) *** | 1.95 (1.79, 2.25) *** |
| Per 0.1 increment |          |                                        | 1.24 (1.20, 1.29) *** | 1.23 (1.18, 1.27) *** | 1.23 (1.19, 1.28) *** |
| Heart disease     |          |                                        |                       |                       |                       |
| Robust            | 707/7917 | 16.43                                  | Reference             | Reference             | Reference             |
| Pre-frailty       | 701/4583 | 28.30                                  | 1.59 (1.43, 1.77) *** | 1.58 (1.42, 1.76) *** | 1.60 (1.43, 1.78) *** |
| Frailty           | 209/1080 | 41.60                                  | 1.95 (1.66, 2.30) *** | 1.93 (1.64, 2.28) *** | 1.97 (1.67, 2.33) *** |
| Per 0.1 increment |          |                                        | 1.23 (1.19, 1.29) *** | 1.22 (1.18, 1.28) *** | 1.23 (1.18, 1.28) *** |
| Stroke            |          |                                        |                       |                       |                       |
| Robust            | 322/7917 | 7.25                                   | Reference             | Reference             | Reference             |
| Pre-frailty       | 256/4583 | 9.71                                   | 1.25 (1.05, 1.47) **  | 1.18 (0.99, 1.40)     | 1.20 (1.02, 1.43) *   |
| Frailty           | 102/1080 | 18.38                                  | 1.97 (1.55, 2.52) *** | 1.77 (1.38, 2.27) *** | 1.81 (1.41, 2.33) *** |
| Per 0.1 increment |          |                                        | 1.24 (1.16, 1.33) *** | 1.20 (1.12, 1.29) *** | 1.21 (1.13, 1.30) *** |

Statistically significant at \* $P < 0.05$ , \*\* $P < 0.01$ , and \*\*\* $P < 0.001$ .

Model 1 was adjusted age and gender.

Model 2 was additionally adjusted educational level, marital status, residence, smoking status, drinking status, hypertension, diabetes mellitus, dyslipidemia, and use of antihypertensive medications, antidiabetic medications and lipid-lowering therapy.

Model 3 was additionally adjusted BMI, SBP and DBP.

**Table S7.** Cross-sectional association between the frailty index and CVD in complete dataset

|                   | Model 1   |                        | Model 2   |                       | Model 3  |                        |
|-------------------|-----------|------------------------|-----------|-----------------------|----------|------------------------|
|                   | Case/N    | OR (95% CI)            | Case/N    | OR (95% CI)           | Case/N   | OR (95% CI)            |
| CVD               |           |                        |           |                       |          |                        |
| Robust            | 688/8791  | Reference              | 673/8672  | Reference             | 505/6619 | Reference              |
| Pre-frail         | 1093/5844 | 2.47 (2.23, 2.75) ***  | 1075/5768 | 2.54 (2.27, 2.84) *** | 848/4807 | 2.44 (2.15, 2.77) ***  |
| Frail             | 537/1658  | 4.64 (4.05, 5.32) ***  | 525/1610  | 4.81 (4.14, 5.58) *** | 381/1212 | 4.86 (4.096, 5.78) *** |
| Per 0.1 increment |           | 1.63 (1.57, 1.69) **   |           | 1.64 (1.57, 1.72) *** |          | 1.75 (1.66, 1.85) ***  |
| Heart disease     |           |                        |           |                       |          |                        |
| Robust            | 611/8791  | Reference              | 598/8672  | Reference             | 447/6619 | Reference              |
| Pre-frail         | 965/5844  | 2.40 (2.15, 2.68) ***  | 949/5768  | 2.49 (2.21, 2.80) *** | 741/4807 | 2.38 (2.09, 2.72) ***  |
| Frail             | 421/1658  | 3.73 (3.23, 4.32) ***  | 412/1610  | 3.84 (3.28, 4.50) *** | 304/1212 | 4.06 (3.38, 4.87) ***  |
| Per 0.1 increment |           | 1.50 (1.44, 1.56) **   |           | 1.50 (1.44, 1.57) **  |          | 1.62 (1.54, 1.71) ***  |
| Stroke            |           |                        |           |                       |          |                        |
| Robust            | 91/8791   | Reference              | 89/8672   | Reference             | 68/6619  | Reference              |
| Pre-frail         | 176/5844  | 2.89 (2.23, 3.75) ***  | 174/5768  | 2.59 (1.98, 3.39) *** | 143/4807 | 2.54 (1.88, 3.44) ***  |
| Frail             | 157/1658  | 8.96 (6.76, 11.87) *** | 153/1610  | 7.23 (5.38, 9.78) *** | 102/1212 | 6.43 (4.55, 9.09) ***  |
| Per 0.1 increment |           | 1.82 (1.71, 1.94) ***  |           | 1.73 (1.61, 1.85) *** |          | 1.80 (1.65, 1.98) ***  |

Statistically significant at \* $P < 0.05$ , \*\* $P < 0.01$ , and \*\*\* $P < 0.001$ .

Model 1 was adjusted age and gender.

Model 2 was additionally adjusted educational level, marital status, residence, smoking status, drinking status, hypertension, diabetes mellitus, dyslipidemia, and use of antihypertensive medications, antidiabetic medications and lipid-lowering therapy.

Model 3 was additionally adjusted BMI, SBP, DBP.

**Table S8.** Longitudinal association between the frailty index and CVD events in complete dataset

|                   | Model 1  |                       | Model 2  |                       | Model 3  |                       |
|-------------------|----------|-----------------------|----------|-----------------------|----------|-----------------------|
|                   | Case/N   | HR (95% CI)           | Case/N   | HR (95% CI)           | Case/N   | HR (95% CI)           |
| CVD               |          |                       |          |                       |          |                       |
| Robust            | 954/7917 | Reference             | 949/7817 | Reference             | 747/5978 | Reference             |
| Pre-frail         | 890/4583 | 1.53 (1.39, 1.68) *** | 883/4531 | 1.51 (1.37, 1.66) *** | 760/3827 | 1.54 (1.39, 1.71) *** |
| Frail             | 278/1045 | 2.19 (1.91, 2.52) *** | 275/1045 | 2.15 (1.86, 2.48) *** | 217/804  | 2.22 (1.89, 2.60) *** |
| Per 0.1 increment |          | 1.30 (1.25, 1.35) *** |          | 1.28 (1.23, 1.33) *** |          | 1.34 (1.28, 1.41) *** |
| Heart disease     |          |                       |          |                       |          |                       |
| Robust            | 707/7917 | Reference             | 702/7817 | Reference             | 551/5978 | Reference             |
| Pre-frail         | 791/4583 | 1.61 (1.44, 1.79) *** | 694/4531 | 1.60 (1.44, 1.79) *** | 595/3827 | 1.63 (1.45, 1.84) *** |
| Frail             | 209/1045 | 2.14 (1.82, 2.52) *** | 207/1045 | 2.14 (1.82, 2.53) *** | 171/804  | 2.32 (1.94, 2.79) *** |
| Per 0.1 increment |          | 1.28 (1.23, 1.34) *** |          | 1.27 (1.22, 1.33) *** |          | 1.36 (1.28, 1.43) *** |
| Stroke            |          |                       |          |                       |          |                       |
| Robust            | 322/7917 | Reference             | 322/7817 | Reference             | 255/5978 | Reference             |
| Pre-frail         | 256/4583 | 1.27 (1.07, 1.50) *   | 255/4531 | 1.20 (1.01, 1.43) *   | 218/3827 | 1.21 (1.01, 1.48) *   |
| Frail             | 102/1045 | 2.26 (1.79, 2.86) *** | 100/1045 | 2.02 (1.58, 2.57) *** | 71/804   | 1.85 (1.40, 2.45) *** |
| Per 0.1 increment |          | 1.31 (1.23, 1.41) *** |          | 1.26 (1.18, 1.36) *** |          | 1.26 (1.15, 1.38) *** |

Statistically significant at \* $P < 0.05$ , \*\* $P < 0.01$ , and \*\*\* $P < 0.001$ .

Model 1 was adjusted age and gender.

Model 2 was additionally adjusted educational level, marital status, residence, smoking status, drinking status, hypertension, diabetes mellitus, dyslipidemia, and use of antihypertensive medications, antidiabetic medications and lipid-lowering therapy.

Model 3 was additionally adjusted BMI, SBP, DBP.

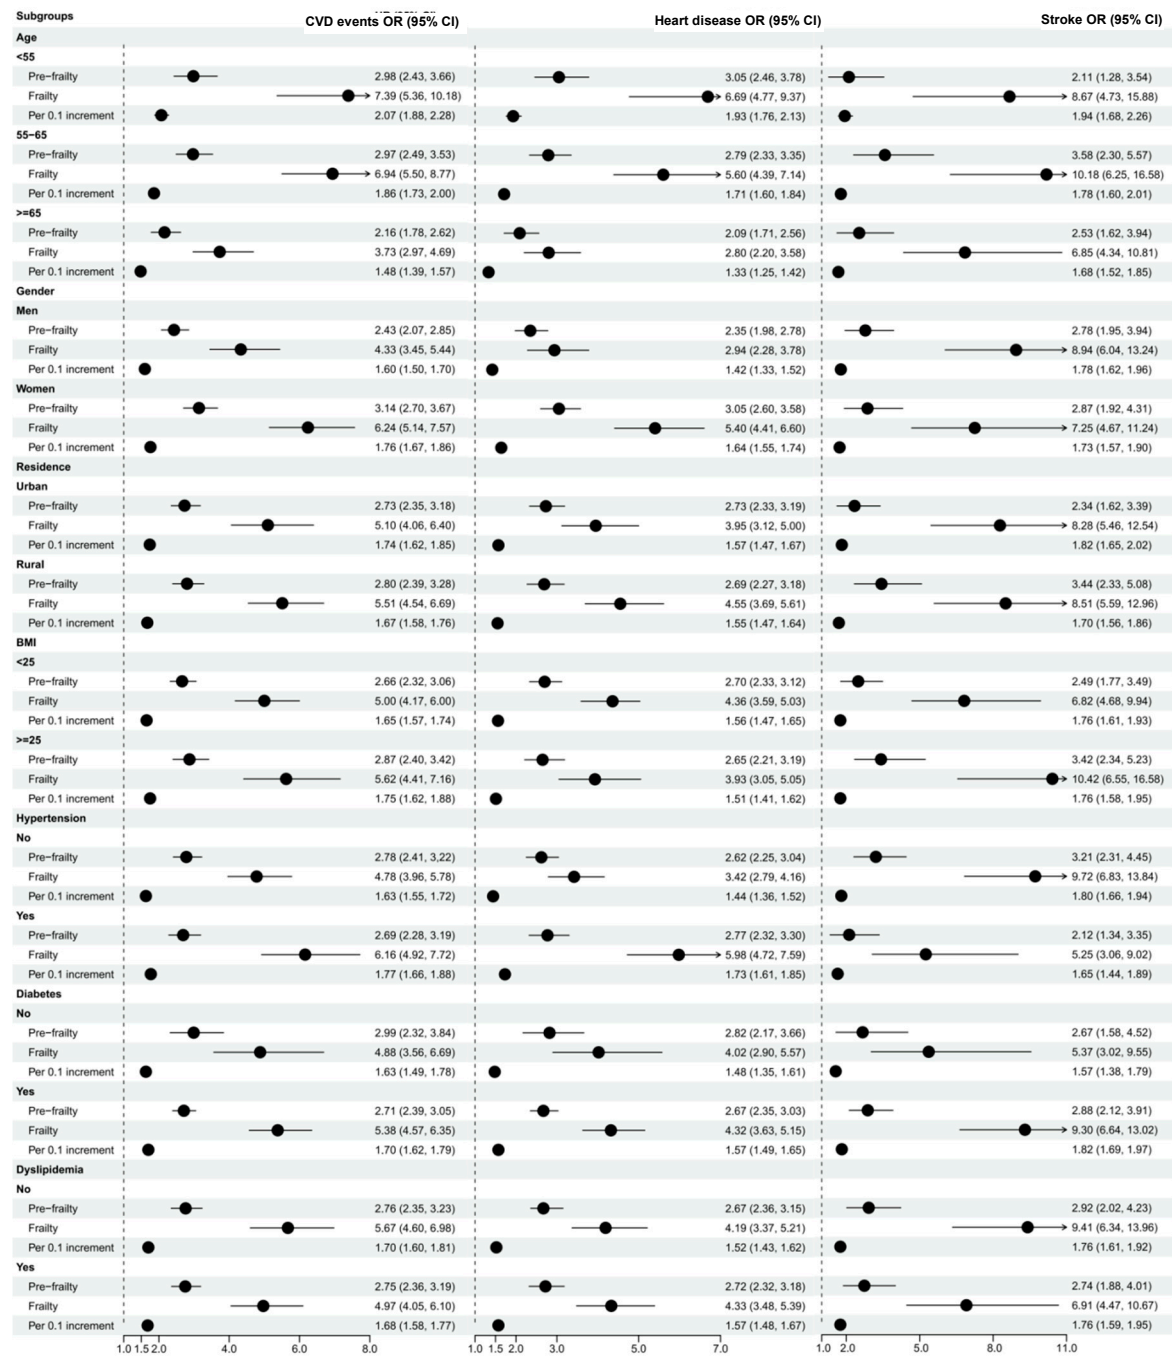

**Figure S1.** Cross-sectional association between the frailty index and CVD stratified by age, gender, residence, BMI, and chronic disease status

Model was adjusted for age, gender, educational level, marital status, residence, smoking status, drinking status, hypertension, diabetes mellitus, dyslipidemia and BMI.
